# Supplementary material for: Microcollinearity in an ethylene receptor coding gene region of the Coffea canephora genome is extensively conserved with Vitis vinifera and other distant dicotyledonous sequenced genomes
Source: PubMed Central journal article supplement (PMC2656508; doi:10.1186/1471-2229-9-22), 2009-02-25
Supplement: 1471-2229-9-22-S1.pdf [file 1471-2229-9-22-S1.pdf]

## Additional files

### Additional file 1. List of homologous collinear predicted genes between *C. canephora* BAC 46C02 and Arabidopsis, tomato, Medicago, grapevine and Populus.

| <i>C. canephora</i><br>genes | Homologous colinear genes                    | Organisms                   | TBLASTN<br>e-value | ESTs     | e-value | % of<br>identity |
|------------------------------|----------------------------------------------|-----------------------------|--------------------|----------|---------|------------------|
| <i>g1</i>                    | <i>Pt-fgenes1_pm.C_scaffold_20100003</i>     | <i>Populus trichocarpa</i>  | e-123              | /        | /       | /                |
| <i>g1</i>                    | <i>Pt-fgenes1_pg.C_LG_XIII000424</i>         | <i>Populus trichocarpa</i>  | e-123              | /        | /       | /                |
| <i>g4</i>                    | <i>Pt-eugene3.02010011</i>                   | <i>Populus trichocarpa</i>  | e-27               | DT475121 | 0.0     | 99%              |
| <i>g4</i>                    | <i>Vv-scaffold_2</i>                         | <i>Vitis vinifera</i>       | e-27               | EC988821 | e-120   | 100%             |
| <i>g5</i>                    | <i>Vv-scaffold_3</i>                         | <i>Vitis vinifera</i>       | e-56               | EC940787 | 0.0     | 100%             |
| <i>g5</i>                    | <i>At3g04590</i>                             | <i>Arabidopsis thaliana</i> | e-38               | BX840094 | 0.0     | 99%              |
| <i>g5</i>                    | <i>Pt-estExt_Genewise1_v1.C_LG_XIII1600</i>  | <i>Populus trichocarpa</i>  | e-51               | CV255878 | 0.0     | 99%              |
| <i>g5</i>                    | <i>Mt-AC173834_18</i>                        | <i>Medicago truncatula</i>  | e-42               | EY475600 | 0.0     | 100%             |
| <i>g5</i>                    | <i>Pt-eugene3.02010010</i>                   | <i>Populus trichocarpa</i>  | e-50               | CK095843 | 0.0     | 97%              |
| <i>g6</i>                    | <i>At3g04580</i>                             | <i>Arabidopsis thaliana</i> | 0.0                | AI993817 | 0.0     | 98%              |
| <i>g6</i>                    | <i>Mt-AC173834_17</i>                        | <i>Medicago truncatula</i>  | 0.0                | BQ255431 | 0.0     | 99%              |
| <i>g6</i>                    | <i>Vv-scaffold_4</i>                         | <i>Vitis vinifera</i>       | 0.0                | EC936812 | 0.0     | 99%              |
| <i>g6</i>                    | <i>Pt-fgenes1_pg.C_LG_XIII000426</i>         | <i>Populus trichocarpa</i>  | 0.0                | DN495148 | 0.0     | 99%              |
| <i>g6</i>                    | <i>Pt-estExt_fgenes1_pg_v1.C_2010007</i>     | <i>Populus trichocarpa</i>  | 0.0                | CV267968 | 0.0     | 99%              |
| <i>g6</i>                    | <i>At3g23150</i>                             | <i>Arabidopsis thaliana</i> | 0.0                | DR368990 | 0.0     | 100%             |
| <i>g7</i>                    | <i>Mt-AC173834_16</i>                        | <i>Medicago truncatula</i>  | e-76               | AL378861 | 0.0     | 100%             |
| <i>g7</i>                    | <i>Vv-scaffold_6</i>                         | <i>Vitis vinifera</i>       | e-59               | EE106074 | 0.0     | 97%              |
| <i>g7</i>                    | <i>Pt-eugene3.00130440</i>                   | <i>Populus trichocarpa</i>  | e-113              | DB888767 | 0.0     | 98%              |
| <i>g8</i>                    | <i>Vv-scaffold_7</i>                         | <i>Vitis vinifera</i>       | e-77               | FC070242 | 0.0     | 100%             |
| <i>g8</i>                    | <i>At3g04570</i>                             | <i>Arabidopsis thaliana</i> | e-48               | DR325809 | 0.0     | 99%              |
| <i>g8</i>                    | <i>Pt-eugene3.00130441</i>                   | <i>Populus trichocarpa</i>  | e-71               | DT515909 | 0.0     | 99%              |
| <i>g8</i>                    | <i>Mt-AC173834_15</i>                        | <i>Medicago truncatula</i>  | e-52               | BE999313 | 0.0     | 99%              |
| <i>g9</i>                    | <i>Vv-scaffold_8</i>                         | <i>Vitis vinifera</i>       | e-101              | BQ794023 | 0.0     | 100%             |
| <i>g9</i>                    | <i>Mt-AC173834_13</i>                        | <i>Medicago truncatula</i>  | e-107              | CB895147 | 0.0     | 98%              |
| <i>g9</i>                    | <i>At3g04560</i>                             | <i>Arabidopsis thaliana</i> | e-108              | BX835785 | 0.0     | 99%              |
| <i>g9</i>                    | <i>Pt-estExt_fgenes1_pm_v1.C_LG_XIII0155</i> | <i>Populus trichocarpa</i>  | e-117              | CV280152 | 0.0     | 99%              |
| <i>g10</i>                   | <i>Vv-scaffold_10</i>                        | <i>Vitis vinifera</i>       | e-47               | EC955073 | 0.0     | 100%             |
| <i>g11</i>                   | <i>Pt-fgenes1_pg.C_LG_XIII000431</i>         | <i>Populus trichocarpa</i>  | e-109              | DT493292 | 0.0     | 99%              |
| <i>g11</i>                   | <i>Mt-AC173834_10</i>                        | <i>Medicago truncatula</i>  | e-99               | EV256119 | 0.0     | 99%              |
| <i>g11</i>                   | <i>At3g04550</i>                             | <i>Arabidopsis thaliana</i> | e-90               | CK119472 | 0.0     | 99%              |
| <i>g11</i>                   | <i>Vv-scaffold_11</i>                        | <i>Vitis vinifera</i>       | e-115              | CV093031 | 0.0     | 99%              |

|            |                                               |                             |       |          |     |      |
|------------|-----------------------------------------------|-----------------------------|-------|----------|-----|------|
| <b>g12</b> | <i>Vv-scaffold_12</i>                         | <i>Vitis vinifera</i>       | e-51  | /        | /   | /    |
| <b>g12</b> | <i>Pt-eugene3.00130447</i>                    | <i>Populus trichocarpa</i>  | e-47  | CV262586 | 0.0 | 99%  |
| <b>g12</b> | <i>At3g23240</i>                              | <i>Arabidopsis thaliana</i> | e-44  | DR751135 | 0.0 | 99%  |
| <b>g14</b> | <i>Pt-eugene3.00130453</i>                    | <i>Populus trichocarpa</i>  | e-177 | /        | /   | /    |
| <b>g14</b> | <i>Mt-AC146861_16</i>                         | <i>Medicago truncatula</i>  | e-152 | CX528565 | 0.0 | 100% |
| <b>g15</b> | <i>At3g04530</i>                              | <i>Arabidopsis thaliana</i> | e-91  | CB254020 | 0.0 | 99%  |
| <b>g15</b> | <i>Sl-CU104691_13</i>                         | <i>Solanum lycopersicon</i> | e-133 | CK271232 | 0.0 | 96%  |
| <b>g15</b> | <i>Pt-eugene3.00130454</i>                    | <i>Populus trichocarpa</i>  | e-104 | DB875035 | 0.0 | 99%  |
| <b>g15</b> | <i>Mt-AC146861_25</i>                         | <i>Medicago truncatula</i>  | e-106 | EY477467 | 0.0 | 99%  |
| <b>g16</b> | <i>Sl-CU104691_12</i>                         | <i>Solanum lycopersicon</i> | 0.0   | BP883946 | 0.0 | 100% |
| <b>g16</b> | <i>Pt-estExt_fgenesh1_pg_v1.C_LG_XIII0467</i> | <i>Populus trichocarpa</i>  | 0.0   | CV260927 | 0.0 | 99%  |
| <b>g17</b> | <i>Sl-CU104691_11</i>                         | <i>Solanum lycopersicon</i> | e-179 | /        | /   | /    |
| <b>g19</b> | <i>At3g23250</i>                              | <i>Arabidopsis thaliana</i> | e-58  | DR750576 | 0.0 | 99%  |
| <b>g21</b> | <i>Sl-CU104691_10.5</i>                       | <i>Solanum lycopersicon</i> | /     | /        | /   | /    |

---
